# Supplementary material for: An Accurate Sequentially Markov Conditional Sampling Distribution for the Coalescent With Recombination
Source: Oxford University Press journal article supplement (doi:10.1534/genetics.110.125534), 2011-01-27
Supplement: 125534_si.pdf [file 125534_si.pdf]

## File S1

### Supporting Information

#### PROOF OF EQUIVALENCE OF $\hat{\pi}_{\text{SMC}}$ AND $\hat{\pi}_{\text{PS},1}$

We now want to give a more detailed proof of Proposition 1 from the main text. With the notation as in the paper we have:

**Proposition 1.** *For an arbitrary single haplotype  $\alpha \in \mathcal{H}$  and haplotype configuration  $\mathbf{n}$ ,  $\hat{\pi}_{\text{SMC}}(\alpha|\mathbf{n}) = \hat{\pi}_{\text{PS},1}(\alpha|\mathbf{n})$ .*

Recall that the initial (stationary) density was given by

$$\zeta^{(\mathbf{n})}(S_\ell = (t_\ell, h_\ell)) = \frac{n_{h_\ell}}{2} e^{-\frac{n}{2}t_\ell}, \quad (\text{S.1})$$

the transition density by

$$\phi_{\rho_b}^{(\mathbf{n})}(s_\ell | s_{\ell-1}) = e^{-\frac{\rho_b}{2}t_{\ell-1}} \delta_{s_{\ell-1}, s_\ell} + \frac{n_{\alpha_\ell}}{n} \int_{t_b=0}^{t_{\ell-1} \wedge t_\ell} \frac{\rho_b}{2} e^{-\frac{\rho_b}{2}t_b} \frac{n}{2} e^{-\frac{n}{2}(t_\ell - t_b)}, \quad (\text{S.2})$$

and the emission probability by

$$\xi_{\theta_\ell}^{(\mathbf{n})}(\alpha[\ell] | s_\ell) = \left[ e^{\frac{\theta_\ell}{2}t_\ell \cdot (P^{(\ell)} - I)} \right]_{h_\ell[\ell], \alpha[\ell]}. \quad (\text{S.3})$$

Since the configuration  $\mathbf{n}$  is fixed, we will drop the superscript  $(\mathbf{n})$  in the sequel. As in the main text we will also omit the recombination and mutation rate when unambiguous. Further, we will omit the  $d$  whenever we write down integrals. If not specified differently, equation-references refer to equations from the main paper.

*Proof of Proposition 1.* We start by showing inductively that the joint density  $f_{\text{SMC}}(\alpha[\ell' : \ell], (t_\ell, h_\ell))$  of observing the partial haplotype  $\alpha[\ell' : \ell]$  and being in the hidden state  $(t_\ell, h_\ell)$  (basically) introduced in equations (4)-(6) satisfies a genealogical recursion  $f$ , defined as follows [c.f., Griffiths and Tavaré (1994)]:

$$\begin{aligned} f(\alpha[\ell' : \ell], (t_\ell, h_\ell)) &= \int_{t_p=0}^{t_\ell} e^{-\frac{n + \sum_u \theta_u + \sum_u \rho_u}{2} t_p} \left[ \frac{n_{h_\ell} \delta_{\alpha[\ell':\ell], h_\ell[\ell':\ell]}}{2} \delta_{t_p, t_\ell} \right. \\ &\quad + \sum_{u \in L(\ell' : \ell)} \frac{\theta_u}{2} \sum_{a \in E_u} P_{a, \alpha[u]}^{(u)} f(\mathcal{S}_u^a(\alpha)[\ell' : \ell], (t_\ell - t_p, h_\ell)) \\ &\quad \left. + \sum_{u \in B(\ell' : \ell)} \frac{\rho_u}{2} \left( \int_{s_{u_1}} f(\alpha[\ell' : u_1], s_{u_1}) \right) f(\alpha[u_2, \ell], (t_\ell - t_p, h_\ell)) \right], \quad (\text{S.4}) \end{aligned}$$

where the sum  $\sum_u$  is over  $L(\ell' : \ell)$ , all loci between (and including)  $\ell'$  and  $\ell$ , and  $\sum_u$  is over  $B(\ell' : \ell)$ , the breakpoints between  $\ell'$  and  $\ell$ . Here  $\mathcal{S}_u^a(\alpha)$  denotes the haplotype obtained by substituting the allele  $a$  at locus  $u$  of  $\alpha$ , and  $u = (u_1, u_2)$ . For  $\ell' = \ell$  (so that  $\ell - \ell' = 0$ ),

$$f(\alpha[\ell], s_\ell) = \int_{t_p=0}^{t_\ell} e^{-\frac{n + \theta_\ell}{2} t_p} \left[ \frac{n_{h_\ell} \delta_{\alpha[\ell], h_\ell[\ell]}}{2} \delta_{t_p, t_\ell} + \frac{\theta}{2} \sum_{a \in E_\ell} P_{a, \alpha[\ell]}^{(\ell)} f(a, (t_\ell - t_p, h_\ell)) \right].$$

Substituting  $f = f_{\text{SMC}}$  on the right-hand side,

$$\begin{aligned}
& \int_{t_p=0}^{t_\ell} e^{-\frac{n+\theta_\ell}{2}t_p} \left[ \frac{n h_\ell \delta_{\alpha[\ell], h_\ell[\ell]}}{2} \delta_{t_p, t_\ell} + \frac{\theta_\ell}{2} \sum_{a \in E_\ell} P_{a, \alpha[\ell]}^{(\ell)} f_{\text{SMC}}(a, (t_\ell - t_p, h_\ell)) \right] \\
&= e^{-\frac{n+\theta_\ell}{2}t_\ell} \frac{n h_\ell \delta_{\alpha[\ell], h_\ell[\ell]}}{2} + \int_{t_p=0}^{t_\ell} e^{-\frac{n+\theta}{2}t_p} \frac{\theta_\ell}{2} \sum_{a \in E_\ell} P_{a, \alpha[\ell]}^{(\ell)} p(a \mid (t_\ell - t_p, h_\ell)) \cdot q_1(t_u - t_p, h_u) \\
&= \frac{n h_\ell}{2} e^{-\frac{n+\theta_\ell}{2}t_\ell} \left( \delta_{\alpha[\ell], h_\ell[\ell]} + \sum_{m=0}^{\infty} \left( \sum_{a \in E_\ell} P_{a, h[\ell]}^{(\ell)} [(P^{(\ell)})^m]_{h_\ell[\ell], a} \right) \int_{t_p=0}^{t_\ell} \frac{\theta_\ell \left( \frac{\theta_\ell}{2} (t_\ell - t_p) \right)^m}{m!} \right) \\
&= \frac{n h_\ell}{2} e^{-\frac{n+\theta_\ell}{2}t_\ell} \left( \delta_{\alpha[\ell], h_\ell[\ell]} + \sum_{m=0}^{\infty} [(P^{(\ell)})^{m+1}]_{h_\ell[\ell], \alpha[\ell]} \frac{\left( \frac{\theta_\ell}{2} (t_\ell) \right)^{m+1}}{(m+1)!} \right) \\
&= \frac{n h_\ell}{2} e^{-\frac{n}{2}t_\ell} \cdot \left[ e^{\frac{\theta_\ell}{2}t_\ell \cdot (P^{(\ell)} - I)} \right]_{h_\ell[\ell], \alpha[\ell]},
\end{aligned}$$

with the final result equal to  $\xi(\alpha[\ell] \mid s_\ell) \zeta(s_\ell) = f_{\text{SMC}}(\alpha[\ell], s_\ell)$ . Now, inductively assuming that  $f_{\text{SMC}}(\alpha[\ell'] : \ell, s_\ell) = f(\alpha[\ell'] : \ell, s_\ell)$  for  $0 \leq \ell - \ell' < m$  and all values of  $s_\ell$ , let  $\ell' < \ell$  such that  $\ell - \ell' = m$ . Substituting  $f = f_{\text{SMC}}$  on the right-hand side of (S.4), we obtain

$$\begin{aligned}
& \int_{t_p=0}^{t_\ell} e^{-\frac{n+\sum_u \theta_u + \sum_u \rho_u}{2} t_p} \left[ \frac{n h_\ell \delta_{\alpha[\ell'] : \ell, h_\ell[\ell'] : \ell}}{2} \delta_{t_p, t_\ell} \right. \\
& \quad + \sum_{u \in L(\ell' : \ell)} \frac{\theta_u}{2} \sum_{a \in E_u} P_{a, \alpha[u]}^{(u)} f_{\text{SMC}}(\mathcal{S}_u^a(\alpha)[\ell' : \ell], (t_\ell - t_p, h_\ell)) \\
& \quad \left. + \sum_{u \in B(\ell' : \ell)} \frac{\rho_u}{2} \left( \int_{s_{u_1}} f_{\text{SMC}}(\alpha[\ell' : u_1], s_{u_1}) \right) f_{\text{SMC}}(\alpha[u_2, \ell], (t_\ell - t_p, h_\ell)) \right]. \quad (\text{S.5})
\end{aligned}$$

We consider this expression one term at a time. Beginning with the first term:

$$\begin{aligned}
& \int_{t_p=0}^{t_\ell} e^{-\frac{n+\sum_u \theta_u + \sum_u \rho_u}{2} t_p} \frac{n h_\ell \delta_{\alpha[\ell'] : \ell, h_\ell[\ell'] : \ell}}{2} \delta_{t_p, t_\ell} \\
&= \int_{s_{\ell-1}} \int_{t_p=0}^{t_{\ell-1}} e^{-\frac{n+\sum_u \theta_u + \sum_u \rho_u}{2} t_p} \frac{n h_{\ell-1} \delta_{\alpha[\ell'] : \ell-1, h_{\ell-1}[\ell'] : \ell-1}}{2} \delta_{t_p, t_{\ell-1}} \left[ e^{-\frac{\theta_{\ell-1} + \rho_{\ell-1}}{2} t_p} \delta_{\alpha[\ell], h_\ell[\ell]} \delta_{s_{\ell-1}, s_\ell} \right], \quad (\text{S.6})
\end{aligned}$$

where  $\sum'_u$  is over  $L(\ell' : \ell - 1)$  and  $\sum'_u$  is over  $B(\ell' : \ell - 1)$ . Moving on to the second term, expand using the definition (5) of  $f_{\text{SMC}}$ , and then use the inductive hypothesis to replace the resulting  $f_{\text{SMC}}$  terms with the corresponding  $f$  terms:

$$\begin{aligned}
& \int_{t_p=0}^{t_\ell} e^{-\frac{n+\sum_u \theta_u + \sum_u \rho_u}{2} t_p} \sum_{u \in L(\ell' : \ell)} \frac{\theta_u}{2} \sum_{a \in E_u} P_{a, \alpha[u]}^{(u)} f_{\text{SMC}}(\mathcal{S}_u^a(\alpha)[\ell' : \ell], (t_\ell - t_p, h_\ell)) \\
&= \int_{t_p=0}^{t_\ell} e^{-\frac{n+\sum_u \theta_u + \sum_u \rho_u}{2} t_p} \sum_{u \in L(\ell' : \ell-1)} \frac{\theta_u}{2} \sum_{a \in E_u} P_{a, \alpha[u]}^{(u)} \\
& \quad \times \xi(\alpha[\ell] \mid (t_\ell - t_p, h_\ell)) \int_{s_{\ell-1}} \phi((t_\ell - t_p, h_\ell) \mid s_{\ell-1}) f(\mathcal{S}_u^a(\alpha)[\ell' : \ell - 1], s_{\ell-1}) \\
& \quad + \int_{t_p=0}^{t_\ell} e^{-\frac{n+\sum_u \theta_u + \sum_u \rho_u}{2} t_p} \frac{\theta_\ell}{2} \sum_{a \in E_u} P_{a, \alpha[\ell]} \\
& \quad \times \xi(a \mid (t_\ell - t_p, h_\ell)) \int_{s_{\ell-1}} \phi((t_\ell - t_p, h_\ell) \mid s_{\ell-1}) f(\alpha[\ell' : \ell - 1], s_{\ell-1}).
\end{aligned}$$

Concentrating on the first sub-term, making the substitution  $t_{\ell-1} \rightarrow t_{\ell-1} + t_p$ , and changing the order of integration, we obtain

$$\begin{aligned} & \int_{s_{\ell-1}} \int_{t_p=0}^{t_{\ell} \wedge t_{\ell-1}} e^{-\frac{n+\sum_u' \theta_u + \sum_u' \rho_u}{2} t_p} \sum_{u \in L(\ell':\ell-1)} \frac{\theta_u}{2} \sum_{a \in E_u} P_{a,\alpha[u]}^{(u)} f(\mathcal{S}_u^a(\alpha)[\ell' : \ell-1], (t_{\ell-1} - t_p, h_{\ell-1})) \\ & \times \left[ e^{-\frac{\theta_{\ell}}{2} t_p} p(\alpha[\ell] \mid (t_{\ell} - t_p, h_{\ell})) \cdot e^{-\frac{\rho_b}{2} t_p} q((t_{\ell} - t_p, h_{\ell}) \mid (t_{\ell-1} - t_p, h_{\ell-1})) \right]. \end{aligned} \quad (\text{S.7})$$

Now concentrating on the second sub-term and expanding using definition (S.4) of  $f$ :

$$\begin{aligned} & \int_{t_p=0}^{t_{\ell}} e^{-\frac{n+\sum_u \theta_u + \sum_u \rho_u}{2} t_p} \frac{\theta_{\ell}}{2} \sum_{a \in E_u} P_{a,\alpha[\ell]} \xi(a \mid (t_{\ell} - t_p, h_{\ell})) \int_{s_{\ell-1}} \phi((t_{\ell} - t_p, h_{\ell}) \mid s_{\ell-1}) \\ & \times \int_{t_q=0}^{t_{\ell-1}} e^{-\frac{n+\sum_u' \theta_u + \sum_u' \rho_u}{2} t_q} \left[ \frac{n h_{\ell-1} \delta_{\alpha[\ell':\ell-1], h_{\ell-1}[\ell':\ell-1]}}{2} \delta_{t_q, t_{\ell-1}} \right. \\ & \quad + \sum_{u \in L(\ell':\ell-1)} \frac{\theta_u}{2} \sum_{a \in E_u} P_{a,\alpha[u]}^{(u)} f(\mathcal{S}_u^a(\alpha)[\ell' : \ell-1], (t_{\ell-1} - t_q, h_{\ell-1})) \\ & \quad \left. + \sum_{u \in B(\ell':\ell-1)} \frac{\rho_u}{2} \left( \int_{s_{u_1}} f(\alpha[\ell' : u_1], s_{u_1}) \right) f(\alpha[u_2, \ell-1], (t_{\ell-1} - t_q, h_{\ell-1})) \right] \\ & = \int_{s_{\ell-1}} \int_{t_q=0}^{t_{\ell-1}} e^{-\frac{n+\sum_u' \theta_u + \sum_u' \rho_u}{2} t_q} \left[ \frac{n h_{\ell-1} \delta_{\alpha[\ell':\ell-1], h_{\ell-1}[\ell':\ell-1]}}{2} \delta_{t_q, t_{\ell-1}} \right. \\ & \quad + \sum_{u \in L(\ell':\ell-1)} \frac{\theta_u}{2} \sum_{a \in E_u} P_{a,\alpha[u]}^{(u)} f(\mathcal{S}_u^a(\alpha)[\ell' : \ell-1], (t_{\ell-1} - t_q, h_{\ell-1})) \\ & \quad \left. + \sum_{u \in B(\ell':\ell-1)} \frac{\rho_u}{2} \left( \int_{s_{u_1}} f(\alpha[\ell' : u_1], s_{u_1}) \right) f(\alpha[u_2, \ell-1], (t_{\ell-1} - t_q, h_{\ell-1})) \right] \\ & \times \left[ \int_{t_p=0}^{t_q \wedge t_{\ell}} e^{-\frac{\theta_{\ell}}{2} t_p} \frac{\theta_{\ell}}{2} \sum_{a \in E_u} P_{a,\alpha[\ell]} \xi(a \mid (t_{\ell} - t_p, h_{\ell})) \cdot e^{-\frac{\rho_b}{2} t_p} \phi((t_{\ell} - t_p, h_{\ell}) \mid (t_{\ell-1} - t_p, h_{\ell-1})) \right], \end{aligned} \quad (\text{S.8})$$

with the equality obtained by making the substitutions  $t_{\ell-1} \rightarrow t_{\ell-1} + t_p$  and  $t_q \rightarrow t_q + t_p$  and then changing the order of integration. Finally, moving onto the third term, expand using the definition (5) of  $f_{\text{SMC}}$ , and then use the inductive hypothesis to replace the resulting  $f_{\text{SMC}}$  terms with the corresponding  $f$  terms:

$$\begin{aligned} & \int_{t_p=0}^{t_{\ell}} e^{-\frac{n+\sum_u \theta_u + \sum_u \rho_u}{2} t_p} \sum_{u \in B(\ell':\ell)} \frac{\rho_u}{2} \left( \int_{s_{u_1}} f_{\text{SMC}}(\alpha[\ell' : u_1], s_{u_1}) \right) f_{\text{SMC}}(\alpha[u_r, \ell], (t_{\ell} - t_p, h_{\ell})) \\ & = \int_{t_p=0}^{t_{\ell}} e^{-\frac{n+\sum_u \theta_u + \sum_u \rho_u}{2} t_p} \sum_{u \in B(\ell':\ell-1)} \frac{\rho_u}{2} \left( \int_{s_{u_1}} f(\alpha[\ell' : u_1], s_{u_1}) \right) \\ & \quad \times \xi(\alpha[\ell] \mid (t_{\ell} - t_p, h_{\ell})) \int_{s_{\ell-1}} \phi((t_{\ell} - t_p, h_{\ell}) \mid s_{\ell-1}) f(\alpha[u_r : \ell-1], s_{\ell-1}) \\ & \quad + \int_{t_p=0}^{t_{\ell}} e^{-\frac{n+\sum_u \theta_u + \sum_u \rho_u}{2} t_p} \frac{\rho_b}{2} \left( \int_{s_{\ell-1}} f(\alpha[\ell' : \ell-1], s_{\ell-1}) \right) \cdot f(\alpha[\ell], (t_{\ell} - t_p, h_{\ell})). \end{aligned}$$

Concentrating on the first sub-term, making the substitution  $t_{\ell-1} \rightarrow t_{\ell-1} + t_p$ , and changing the order of integration, we obtain:

$$\begin{aligned} & \int_{s_{\ell-1}} \int_{t_p=0}^{t_{\ell} \wedge t_{\ell-1}} e^{-\frac{n+\sum'_u \theta_u + \sum'_u \rho_u}{2} t_p} \sum_{u \in B(\ell':\ell-1)} \frac{\rho_u}{2} \left( \int_{s_{u_1}} f(\alpha[\ell' : u_1], s_{u_1}) \right) f(\alpha[u_2 : \ell-1], (t_{\ell-1} - t_p, h_{\ell-1})) \\ & \times \left[ e^{-\frac{\theta_{\ell}}{2} t_p} \xi(\alpha[\ell] \mid (t_{\ell} - t_p, h_{\ell})) \cdot e^{-\frac{\rho_b}{2} t_p} \phi((t_{\ell} - t_p, h_{\ell}) \mid (t_{\ell-1} - t_p, h_{\ell-1})) \right]. \end{aligned} \quad (\text{S.9})$$

Now concentrating on the second sub-term and expanding using definition (S.4) of  $f$ :

$$\begin{aligned} & \int_{t_p=0}^{t_{\ell}} e^{-\frac{n+\sum'_u \theta_u + \sum'_u \rho_u}{2} t_p} \frac{\rho_b}{2} f(\alpha[\ell], (t_{\ell} - t_p, h_{\ell})) \\ & \times \int_{s_{\ell-1}} \int_{t_q=0}^{t_{\ell-1}} e^{-\frac{n+\sum'_u \theta_u + \sum'_u \rho_u}{2} t_q} \left[ \frac{n_{h_{\ell-1}} \delta_{\alpha[\ell':\ell-1], h_{\ell-1}[\ell':\ell-1]}}{2} \delta_{t_q, t_{\ell-1}} \right. \\ & \quad + \sum_{u \in L(\ell':\ell-1)} \frac{\theta_u}{2} \sum_{a \in E_u} P_{a, \alpha[u]}^{(u)} f(\mathcal{S}_u^a(\alpha)[\ell' : \ell-1], (t_{\ell-1} - t_q, h_{\ell-1})) \\ & \quad \left. + \sum_{u \in B(\ell':\ell-1)} \frac{\rho_u}{2} \left( \int_{s_{u_1}} f(\alpha[\ell' : u_1], s_{u_1}) \right) f(\alpha[u_2, \ell-1], (t_{\ell-1} - t_q, h_{\ell-1})) \right] \\ & = \int_{s_{\ell-1}} \int_{t_q=0}^{t_{\ell-1}} e^{-\frac{n+\sum'_u \theta_u + \sum'_u \rho_u}{2} t_q} \left[ \frac{n_{h_{\ell-1}} \delta_{\alpha[\ell':\ell-1], h_{\ell-1}[\ell':\ell-1]}}{2} \delta_{t_q, t_{\ell-1}} \right. \\ & \quad + \sum_{u \in L(\ell':\ell-1)} \frac{\theta_u}{2} \sum_{a \in E_u} P_{a, \alpha[u]}^{(u)} f(\mathcal{S}_u^a(\alpha)[\ell' : \ell-1], (t_{\ell-1} - t_q, h_{\ell-1})) \\ & \quad \left. + \sum_{u \in B(\ell':\ell-1)} \frac{\rho_u}{2} \left( \int_{s_{u_1}} f(\alpha[\ell' : u_1], s_{u_1}) \right) f(\alpha[u_2, \ell-1], (t_{\ell-1} - t_q, h_{\ell-1})) \right] \\ & \times \left[ \int_{t_p=0}^{t_q \wedge t_{\ell}} e^{-\frac{\theta_{\ell}}{2} t_p} \xi(\alpha[\ell] \mid (t_{\ell} - t_p, h_{\ell})) \cdot e^{-\frac{\rho_b}{2} t_p} \frac{\rho_b}{2} \frac{n_{h_{\ell}}}{2} e^{-\frac{n}{2}(t_{\ell}-t_p)} \right], \end{aligned} \quad (\text{S.10})$$

with the equality obtained by using the (one-locus) definition (6) for  $f_{\text{SMC}}(\alpha[\ell], (t_{\ell} - t_p, h_{\ell}))$ , making the substitutions  $t_{\ell-1} \rightarrow t_{\ell-1} + t_p$  and  $t_q \rightarrow t_q + t_p$ , and changing the order of integration.

Having appropriately expanded each term of our key expression (S.5), we aggregate common terms across the resulting sub-expressions. Collecting the  $n_{h_{\ell-1}} \delta_{\alpha[\ell':\ell-1], h_{\ell-1}[\ell':\ell-1]}$  terms from (S.6),(S.8),

and (S.10),

$$\begin{aligned}
& \int_{s_{\ell-1}} \int_{t_p=0}^{t_{\ell-1}} e^{-\frac{n+\sum'_u \theta_u + \sum'_u \rho_u}{2} t_p} \frac{n_{h_{\ell-1}} \delta_{\alpha[\ell':\ell-1], h_{\ell-1}[\ell':\ell-1]}}{2} \delta_{t_p, t_{\ell-1}} \\
& \quad \times \left[ e^{-\frac{\theta_{\ell} + \rho_b}{2} t_p} \delta_{\alpha[\ell], h_{\ell}[\ell]} \delta_{s_{\ell-1}, s_{\ell}} \right. \\
& \quad + \int_{t_q=0}^{t_p \wedge t_{\ell}} e^{-\frac{\theta_{\ell}}{2} t_q} \frac{\theta_{\ell}}{2} \sum_{a \in E_u} P_{a, \alpha[\ell]} \xi(a | (t_{\ell} - t_q, h_{\ell})) \cdot e^{-\frac{\rho_b}{2} t_q} \phi((t_{\ell} - t_q, h_{\ell}) | (t_{\ell-1} - t_q, h_{\ell-1})) \\
& \quad \left. + \int_{t_q=0}^{t_p \wedge t_{\ell}} e^{-\frac{\theta_{\ell}}{2} t_q} \xi(\alpha[\ell] | (t_{\ell} - t_q, h_{\ell})) \cdot e^{-\frac{\rho_b}{2} t_q} \frac{\rho_b}{2} \frac{n_{h_{\ell}}}{2} e^{-\frac{n}{2}(t_{\ell} - t_q)} \right] \\
& = \int_{s_{\ell-1}} \int_{t_p=0}^{t_{\ell-1}} e^{-\frac{n+\sum'_u \theta_u + \sum'_u \rho_u}{2} t_p} \frac{n_{h_{\ell-1}} \delta_{\alpha[\ell':\ell-1], h_{\ell-1}[\ell':\ell-1]}}{2} \delta_{t_p, t_{\ell-1}} \\
& \quad \times \left[ e^{-\frac{\rho_b}{2} t_{\ell-1}} \delta_{s_{\ell-1}, s_{\ell}} \cdot \left( e^{-\frac{\theta_{\ell}}{2} t_{\ell}} \delta_{\alpha[\ell], h_{\ell}[\ell]} \right) \right. \\
& \quad + e^{-\frac{\rho_b}{2} t_{\ell-1}} \delta_{s_{\ell-1}, s_{\ell}} \left( \int_{t_z=0}^{t_{\ell}} e^{-\frac{\theta_{\ell}}{2} t_z} \frac{\theta_{\ell}}{2} \sum_{a \in E_u} P_{a, \alpha[\ell]} \xi(a | (t_{\ell} - t_z, h_{\ell})) \right) \\
& \quad + \int_{t_q=0}^{t_{\ell-1} \wedge t_{\ell}} \frac{\rho_b}{2} e^{-\frac{\rho_b}{2} t_q} \frac{n_{h_{\ell}}}{2} e^{-\frac{n}{2}(t_{\ell} - t_q)} \left( \int_{t_z=0}^{t_q} e^{-\frac{\theta_{\ell}}{2} t_z} \frac{\theta_{\ell}}{2} \sum_{a \in E_u} P_{a, \alpha[\ell]} \xi(a | (t_{\ell} - t_z, h_{\ell})) \right) \\
& \quad \left. + \int_{t_q=0}^{t_{\ell-1} \wedge t_{\ell}} \frac{\rho_b}{2} e^{-\frac{\rho_b}{2} t_q} \frac{n_{h_{\ell}}}{2} e^{-\frac{n}{2}(t_{\ell} - t_q)} \left( e^{-\frac{\theta_{\ell}}{2} t_q} \xi(\alpha[\ell] | (t_{\ell} - t_q, h_{\ell})) \right) \right] \\
& = \int_{s_{\ell-1}} \int_{t_p=0}^{t_{\ell-1}} e^{-\frac{n+\sum'_u \theta_u + \sum'_u \rho_u}{2} t_p} \frac{n_{h_{\ell-1}} \delta_{\alpha[\ell':\ell-1], h_{\ell-1}[\ell':\ell-1]}}{2} \delta_{t_p, t_{\ell-1}} \\
& \quad \times \xi(\alpha[\ell] | s_{\ell}) \left[ e^{-\frac{\rho_b}{2} t_{\ell-1}} \delta_{s_{\ell-1}, s_{\ell}} + \int_{t_q=0}^{t_{\ell-1} \wedge t_{\ell}} \frac{\rho_b}{2} e^{-\frac{\rho_b}{2} t_q} \frac{n_{h_{\ell}}}{2} e^{-\frac{n}{2}(t_{\ell} - t_q)} \right] \\
& = \int_{s_{\ell-1}} \int_{t_p=0}^{t_{\ell-1}} e^{-\frac{n+\sum'_u \theta_u + \sum'_u \rho_u}{2} t_p} \frac{n_{h_{\ell-1}} \delta_{\alpha[\ell':\ell-1], h_{\ell-1}[\ell':\ell-1]}}{2} \delta_{t_p, t_{\ell-1}} \times \left[ \xi(\alpha[\ell] | s_{\ell}) \phi(s_{\ell} | s_{\ell-1}) \right], \quad (\text{S.11})
\end{aligned}$$

where the first equality is obtained by making use of the  $\delta_{t_p, t_{\ell-1}}$  and  $\delta_{s_{\ell-1}, s_{\ell}}$  expressions and expanding the  $q$  term using equation (S.2) and exchanging integrals, the second equality is obtained by combining the first/second and third/fourth term along with the definition (S.3) of  $p$ , and final equality by again making use of the equation (S.2).

Similarly, collecting the  $f(\mathcal{S}_u^a(\alpha)[\ell' : \ell - 1], (t_{\ell-1} - t_q, h_{\ell-1}))$  terms from the resulting sub-expressions

(S.7),(S.8), and (S.10),

$$\begin{aligned}
& \int_{s_{\ell-1}} \int_{t_p=0}^{t_{\ell-1}} e^{-\frac{n+\sum'_u \theta_u + \sum'_u \rho_u}{2} t_p} \sum_{u \in L(\ell':\ell-1)} \frac{\theta_u}{2} \sum_{a \in E_u} P_{a,\alpha[u]}^{(u)} f(\mathcal{S}_u^a(\alpha)[\ell' : \ell-1], (t_{\ell-1} - t_p, h_{\ell-1})) \\
& \quad \times \left[ \mathbb{I}_{(t_p \leq t_\ell)} e^{-\frac{\theta_\ell}{2} t_p} \xi(\alpha[\ell] \mid (t_\ell - t_p, h_\ell)) \cdot e^{-\frac{\rho_b}{2} t_p} \phi((t_\ell - t_p, h_\ell) \mid (t_{\ell-1} - t_p, h_{\ell-1})) \right. \\
& \quad + \int_{t_q=0}^{t_p \wedge t_\ell} e^{-\frac{\theta_\ell}{2} t_q} \frac{\theta_\ell}{2} \sum_{a \in E_u} P_{a,\alpha[\ell]} \xi(a \mid (t_\ell - t_q, h_\ell)) \cdot e^{-\frac{\rho_b}{2} t_q} \phi((t_\ell - t_q, h_\ell) \mid (t_{\ell-1} - t_q, h_{\ell-1})) \\
& \quad \left. + \int_{t_q=0}^{t_p \wedge t_\ell} e^{-\frac{\theta_\ell}{2} t_q} \xi(\alpha[\ell] \mid (t_\ell - t_q, h_\ell)) \cdot e^{-\frac{\rho_b}{2} t_q} \frac{\rho_b}{2} \frac{n_{h_\ell}}{2} e^{-\frac{n}{2}(t_\ell - t_q)} \right] \\
& = \int_{s_{\ell-1}} \int_{t_p=0}^{t_{\ell-1}} e^{-\frac{n+\sum'_u \theta_u + \sum'_u \rho_u}{2} t_p} \sum_{u \in L(\ell':\ell-1)} \frac{\theta_u}{2} \sum_{a \in E_u} P_{a,\alpha[u]}^{(u)} f(\mathcal{S}_u^a(\alpha)[\ell' : \ell-1], (t_{\ell-1} - t_p, h_{\ell-1})) \\
& \quad \times \left[ \mathbb{I}_{(t_p \leq t_\ell)} e^{-\frac{\rho_b}{2} t_p} \phi((t_\ell - t_p, h_\ell) \mid (t_{\ell-1} - t_p, h_{\ell-1})) \left( e^{-\frac{\theta_\ell}{2} t_p} \xi(\alpha[\ell] \mid (t_\ell - t_p, h_\ell)) \right) \right. \\
& \quad + \mathbb{I}_{(t_p \leq t_\ell)} e^{-\frac{\rho_b}{2} t_p} \phi((t_\ell - t_p, h_\ell) \mid (t_{\ell-1} - t_p, h_{\ell-1})) \left( \int_{t_z=0}^{t_p} e^{-\frac{\theta_\ell}{2} t_z} \frac{\theta_\ell}{2} \sum_{a \in E_u} P_{a,\alpha[\ell]} \xi(a \mid (t_\ell - t_z, h_\ell)) \right) \\
& \quad + \int_{t_q=0}^{t_p \wedge t_\ell} \frac{\rho_b}{2} e^{-\frac{\rho_b}{2} t_q} \frac{n_{h_\ell}}{2} e^{-\frac{n}{2}(t_\ell - t_q)} \left( \int_{t_z=0}^{t_q} e^{-\frac{\theta_\ell}{2} t_z} \frac{\theta_\ell}{2} \sum_{a \in E_u} P_{a,\alpha[\ell]} \xi(a \mid (t_\ell - t_z, h_\ell)) \right) \\
& \quad \left. + \int_{t_q=0}^{t_p \wedge t_\ell} \frac{\rho_b}{2} e^{-\frac{\rho_b}{2} t_q} \frac{n_{h_\ell}}{2} e^{-\frac{n}{2}(t_\ell - t_q)} \left( e^{-\frac{\theta_\ell}{2} t_q} \xi(\alpha[\ell] \mid (t_\ell - t_q, h_\ell)) \right) \right] \\
& = \int_{s_{\ell-1}} \int_{t_p=0}^{t_{\ell-1}} e^{-\frac{n+\sum'_u \theta_u + \sum'_u \rho_u}{2} t_p} \sum_{u \in L(\ell':\ell-1)} \frac{\theta_u}{2} \sum_{a \in E_u} P_{a,\alpha[u]}^{(u)} f(\mathcal{S}_u^a(\alpha)[\ell' : \ell-1], (t_{\ell-1} - t_p, h_{\ell-1})) \\
& \quad \times \xi(\alpha[\ell] \mid s_\ell) \left[ \mathbb{I}_{(t_p \leq t_\ell)} e^{-\frac{\rho_b}{2} t_p} \phi((t_\ell - t_p, h_\ell) \mid (t_{\ell-1} - t_p, h_{\ell-1})) + \int_{t_q=0}^{t_p \wedge t_\ell} \frac{\rho_b}{2} e^{-\frac{\rho_b}{2} t_q} \frac{n_{h_\ell}}{2} e^{-\frac{n}{2}(t_\ell - t_q)} \right] \\
& = \int_{s_{\ell-1}} \int_{t_p=0}^{t_{\ell-1}} e^{-\frac{n+\sum'_u \theta_u + \sum'_u \rho_u}{2} t_p} \sum_{u \in L(\ell':\ell-1)} \frac{\theta_u}{2} \sum_{a \in E_u} P_{a,\alpha[u]}^{(u)} f(\mathcal{S}_u^a(\alpha)[\ell' : \ell-1], (t_{\ell-1} - t_p, h_{\ell-1})) \\
& \quad \times \left[ \xi(\alpha[\ell] \mid s_\ell) \phi(s_\ell \mid s_{\ell-1}) \right], \tag{S.12}
\end{aligned}$$

where the first equality is obtained by expanding the  $\phi$  term<sup>1</sup> in the second term using equation (S.2), the second equality is obtained by combining the first/second and third/fourth term along with the definition (S.3) of  $\xi$ , and final equality by again making use of the equation (S.2) and considering separately the case when  $t_p \leq t_\ell$  and  $t_p > t_\ell$ .

The situation is identical when collecting terms with  $f(\alpha[u_2, \ell-1], (t_{\ell-1} - t_q, h_{\ell-1}))$  from (S.9),

---

<sup>1</sup>We use the following expansion for  $\phi$ , which can be verified in the present context, namely that  $t_q \leq t_p \leq t_{\ell-1}$  and  $t_q \leq t_\ell$ :

$$\begin{aligned}
\phi((t_\ell - t_q, h_\ell) \mid (t_{\ell-1} - t_q, h_{\ell-1})) &= \mathbb{I}_{(t_p \leq t_\ell)} e^{-\frac{\rho_b}{2}(t_p - t_q)} \cdot \phi((t_\ell - t_p, h_\ell) \mid (t_{\ell-1} - t_p, h_{\ell-1})) \\
& \quad + \int_{t_z=0}^{(t_p \wedge t_\ell) - t_q} \frac{\rho_b}{2} e^{-\frac{\rho_b}{2} t_z} \frac{n_{h_\ell}}{2} e^{-\frac{n}{2}(t_\ell - t_q - t_z)}
\end{aligned}$$

(S.8), and (S.10):

$$\begin{aligned}
& \int_{s_{\ell-1}} \int_{t_p=0}^{t_{\ell-1}} e^{-\frac{n+\sum'_u \theta_u + \sum'_u \rho_u}{2} t_p} \sum_{u \in B(\ell':\ell-1)} \frac{\rho_u}{2} \left( \int_{s_{u_1}} f(\alpha[\ell' : u_1], s_{u_1}) \right) f(\alpha[u_2 : \ell-1], (t_{\ell-1} - t_p, h_{\ell-1})) \\
& \times \left[ \mathbb{I}_{(t_p \leq t_{\ell})} e^{-\frac{\theta_{\ell}}{2} t_p} \xi(\alpha[\ell] | (t_{\ell} - t_p, h_{\ell})) \cdot e^{-\frac{\rho_b}{2} t_p} \phi((t_{\ell} - t_p, h_{\ell}) | (t_{\ell-1} - t_p, h_{\ell-1})) \right. \\
& \quad + \int_{t_q=0}^{t_p \wedge t_{\ell}} e^{-\frac{\theta_{\ell}}{2} t_q} \frac{\theta_{\ell}}{2} \sum_{a \in E_u} P_{a, \alpha[\ell]} \xi(a | (t_{\ell} - t_q, h_{\ell})) \cdot e^{-\frac{\rho_b}{2} t_q} \phi((t_{\ell} - t_q, h_{\ell}) | (t_{\ell-1} - t_q, h_{\ell-1})) \\
& \quad \left. + \int_{t_q=0}^{t_p \wedge t_{\ell}} e^{-\frac{\theta_{\ell}}{2} t_q} \xi(\alpha[\ell] | (t_{\ell} - t_q, h_{\ell})) \cdot e^{-\frac{\rho_b}{2} t_q} \frac{\rho_b}{2} \frac{n_{h_{\ell}}}{2} e^{-\frac{n}{2}(t_{\ell} - t_q)} \right] \\
& = \int_{s_{\ell-1}} \int_{t_p=0}^{t_{\ell-1}} e^{-\frac{n+\sum'_u \theta_u + \sum'_u \rho_u}{2} t_p} \sum_{u \in B(\ell':\ell-1)} \frac{\rho_u}{2} \left( \int_{s_{u_1}} f(\alpha[\ell' : u_1], s_{u_1}) \right) f(\alpha[u_2 : \ell-1], (t_{\ell-1} - t_p, h_{\ell-1})) \\
& \times \left[ \xi(\alpha[\ell] | s_{\ell}) \phi(s_{\ell} | s_{\ell-1}) \right]. \tag{S.13}
\end{aligned}$$

Thus, combining equations (S.11), (S.12), and (S.13), we may re-write (S.5):

$$\begin{aligned}
& \xi(\alpha[\ell] | s_{\ell}) \int_{s_{\ell-1}} \phi(s_{\ell} | s_{\ell-1}) \cdot \int_{t_p=0}^{t_{\ell-1}} e^{-\frac{n+\sum'_u \theta_u + \sum'_u \rho_u}{2} t_p} \left[ \frac{n_{h_{\ell-1}} \delta_{\alpha[\ell':\ell-1], h_{\ell-1}[\ell':\ell-1]}}{2} \delta_{t_p, t_{\ell-1}} \right. \\
& \quad + \sum_{u \in L(\ell':\ell-1)} \frac{\theta_u}{2} \sum_{a \in E_u} P_{a, \alpha[u]}^{(u)} f(\mathcal{S}_u^a(\alpha)[\ell' : \ell-1], (t_{\ell-1} - t_p, h_{\ell-1})) \\
& \quad \left. + \sum_{u \in B(\ell':\ell-1)} \frac{\rho_u}{2} \left( \int_{s_{u_1}} f(\alpha[\ell' : u_1], s_{u_1}) \right) f(\alpha[u_2 : \ell-1], (t_{\ell-1} - t_p, h_{\ell-1})) \right] \\
& = \xi(\alpha[\ell] | s_{\ell}) \int_{s_{\ell-1}} \phi(s_{\ell} | s_{\ell-1}) f(\alpha[\ell' : \ell-1], s_{\ell-1}) \\
& = f_{\text{SMC}}(\alpha[\ell' : \ell], s_{\ell}),
\end{aligned}$$

where the first equality is obtained by definition (S.4) for  $f$ , and the second equality by using the inductive hypothesis and the definition (5). Therefore,  $f_{\text{SMC}}$  satisfies the recursion for  $f$ , and we

conclude that  $f_{\text{SMC}} = f$ . Moreover,

$$\begin{aligned}
\int_{s_\ell} f(\alpha[\ell' : \ell], s_\ell) &= \int_{s_\ell} \int_{t_p=0}^{t_\ell} e^{-\frac{n+\sum_u \theta_u + \sum_u \rho_u}{2} t_p} \left[ \frac{n h_\ell \delta_{\alpha[\ell':\ell], h_\ell[\ell':\ell]}}{2} \delta_{t_p, t_\ell} \right. \\
&\quad + \sum_{u \in L(\ell':\ell)} \frac{\theta_u}{2} \sum_{a \in E_u} P_{a, \alpha[u]}^{(u)} f(\mathcal{S}_u^a(\alpha)[\ell' : \ell], (t_\ell - t_p, h_\ell)) \\
&\quad \left. + \sum_{u \in B(\ell':\ell)} \frac{\rho_u}{2} \left( \int_{s_{u_1}} f(\alpha[\ell' : u_1], s_{u_1}) \right) f(\alpha[u_2, \ell], (t_\ell - t_p, h_\ell)) \right] \\
&= \frac{1}{n + \sum_{u \in L(\alpha[\ell':\ell])} \theta_u + \sum_{u \in B(\alpha[\ell':\ell])} \rho_u} \left[ \sum_{\substack{\alpha' \in \mathcal{H}: \\ \alpha'[\ell':\ell] = \alpha[\ell':\ell]}} n_{\alpha'} \right. \\
&\quad + \sum_{u \in L(\alpha[\ell':\ell])} \theta_u \sum_{a \in E_u} P_{a, \alpha[u]}^{(u)} \int_{s_\ell} f(\mathcal{S}_u^a(\alpha)[\ell' : \ell], s_\ell) \\
&\quad \left. + \sum_{u \in B(\alpha[\ell':\ell])} \rho_u \int_{s_{u_1}} f(\alpha[\ell' : u_1], s_{u_1}) \int_{s_\ell} f(\alpha[u_2, \ell], s_\ell) \right],
\end{aligned}$$

where the first equality is by definition (S.4), and the second equality obtained by exchanging the integrals and making the substitution  $t_\ell \rightarrow t_\ell - t_p$ . Thus,  $\int_{s_\ell} f(\alpha[\ell' : \ell], s_\ell)$  satisfies the recursion for  $\hat{\pi}_{\text{PS},1}$  (Paul and Song, 2010, Equation (12)) and we conclude that  $\int_{s_\ell} f(\alpha[\ell' : \ell], s_\ell) = \hat{\pi}_{\text{PS},1}(\alpha[\ell' : \ell])$ . Thus,

$$\hat{\pi}_{\text{SMC}}(\alpha[\ell' : \ell]) = \int_{s_\ell} f_{\text{SMC}}(\alpha[\ell' : \ell], s_\ell) = \int_{s_\ell} f(\alpha[\ell' : \ell], s_\ell) = \hat{\pi}_{\text{PS},1}(\alpha[\ell' : \ell]),$$

thereby establishing the desired identity.  $\square$

#### LITERATURE CITED

- Griffiths, R. C. and Tavaré, S. 1994. Sampling theory for neutral alleles in a varying environment. *Philos. Trans. R. Soc. Lond. B Biol. Sci.*, **344**, 403–410.
- Paul, J. S. and Song, Y. S. 2010. A principled approach to deriving approximate conditional sampling distributions in population genetics models with recombination. *Genetics*, **186**, 321–338.
